# Supplementary material for: A new method for inferring city emissions and lifetimes of nitrogen oxides from high-resolution nitrogen dioxide observations: A model study
Source: Copernicus journal article supplement (doi:10.5194/acp-2021-642), 2021-08-19
Supplement: Supplementary file 1 [file acp-2021-642-supplement.pdf]

# Supplementary Materials for

A new method for inferring city emissions and lifetimes of nitrogen oxides from  
high-resolution nitrogen dioxide observations: A model study

Fei Liu, Zhining Tao, Steffen Beirle, Joanna Joiner, Yasuko Yoshida, Steven J. Smith, K. Emma  
Knowland, Thomas Wagner

Correspondence to: [fei.liu@nasa.gov](mailto:fei.liu@nasa.gov)

**This PDF file includes:**

Figs. S1 to S3

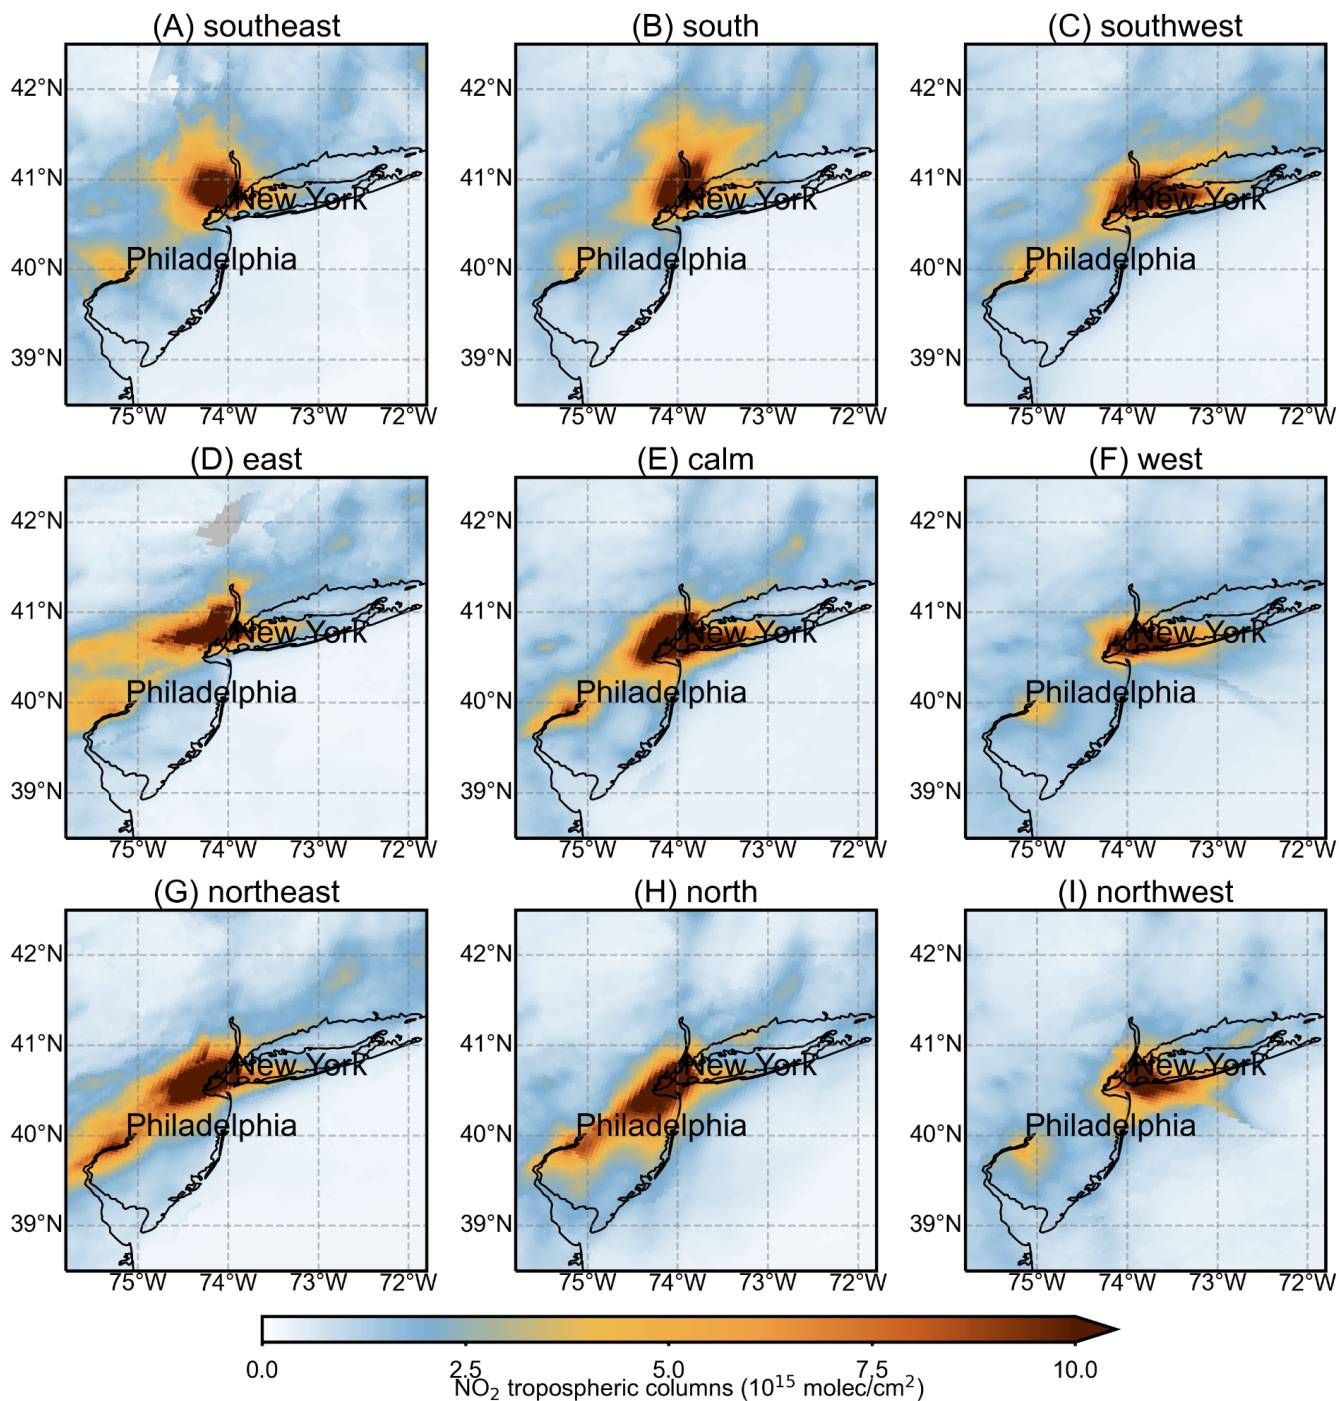

**Figure S1** Wind dependency of the NU-WRF tropospheric NO<sub>2</sub> vertical column densities around New York City. NO<sub>2</sub> columns at the local overpass time of TROPOMI are averaged from April through September, 2016. Mean NO<sub>2</sub> column densities for different wind conditions, i.e., calm (center panel) and eight main wind direction sectors (surrounding panels; titles indicate the mean of the respective winds). Missing data due to lack of observations for a certain wind direction is in grey.

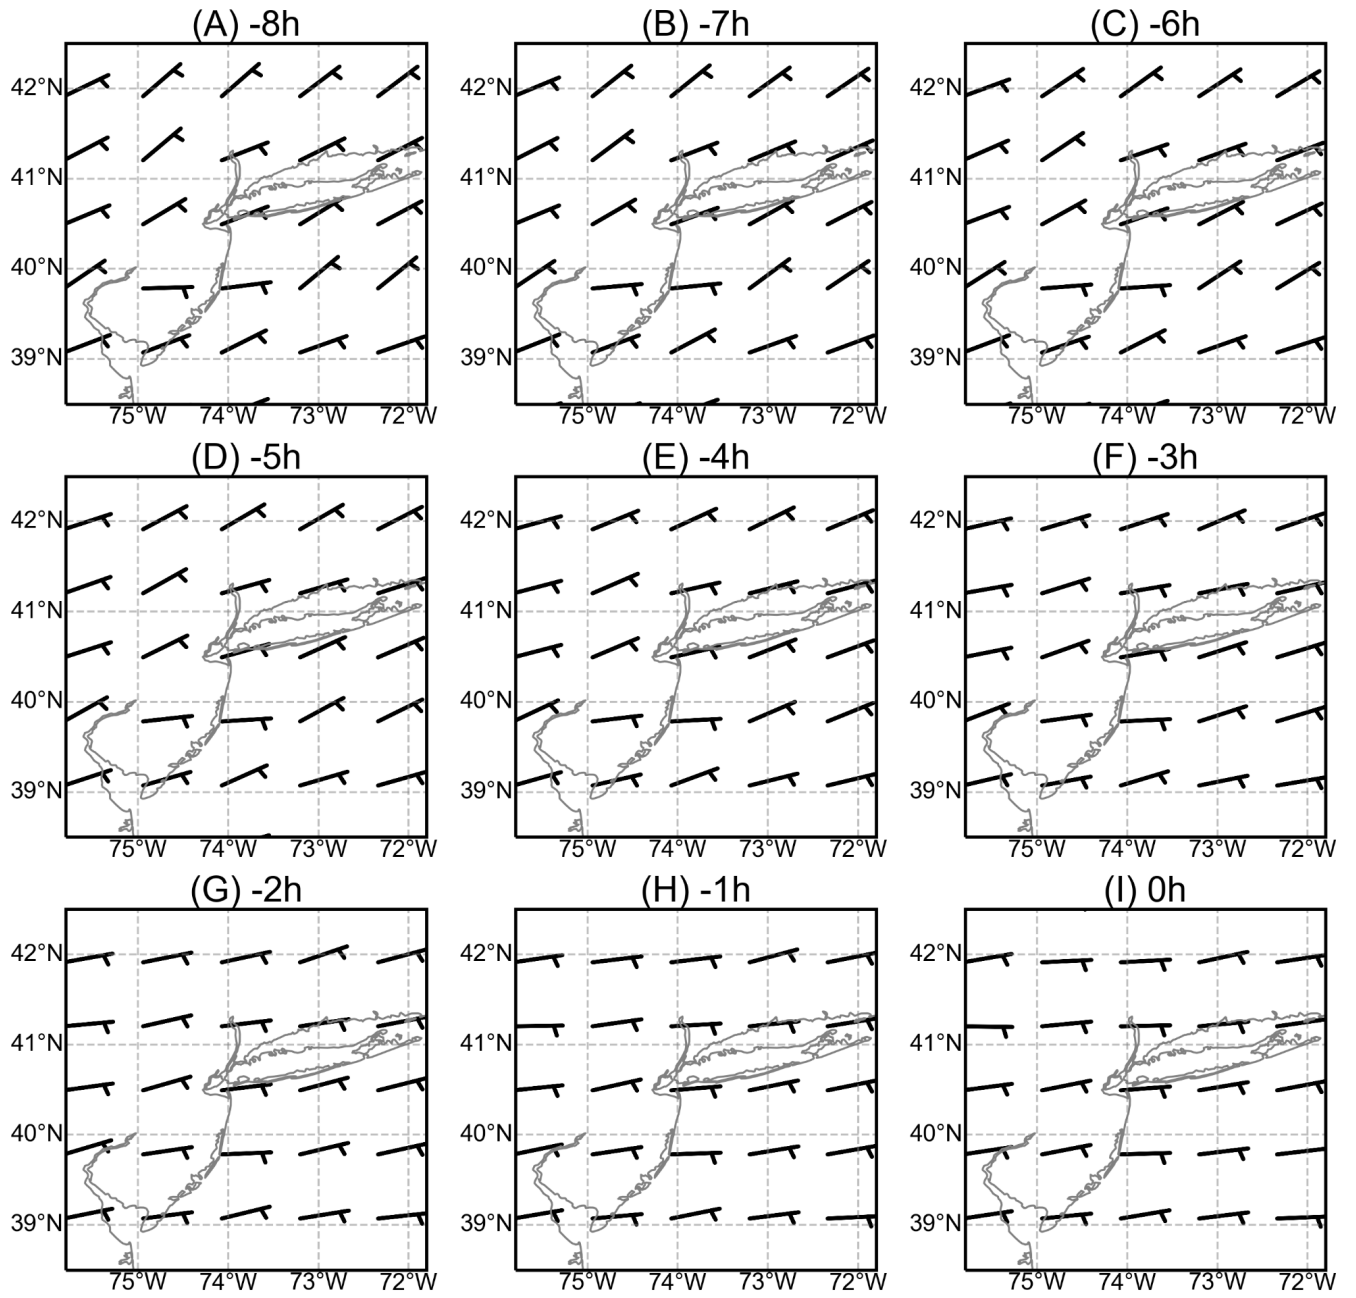

**Figure S2** Similar to Figure 5, but for easterly wind.

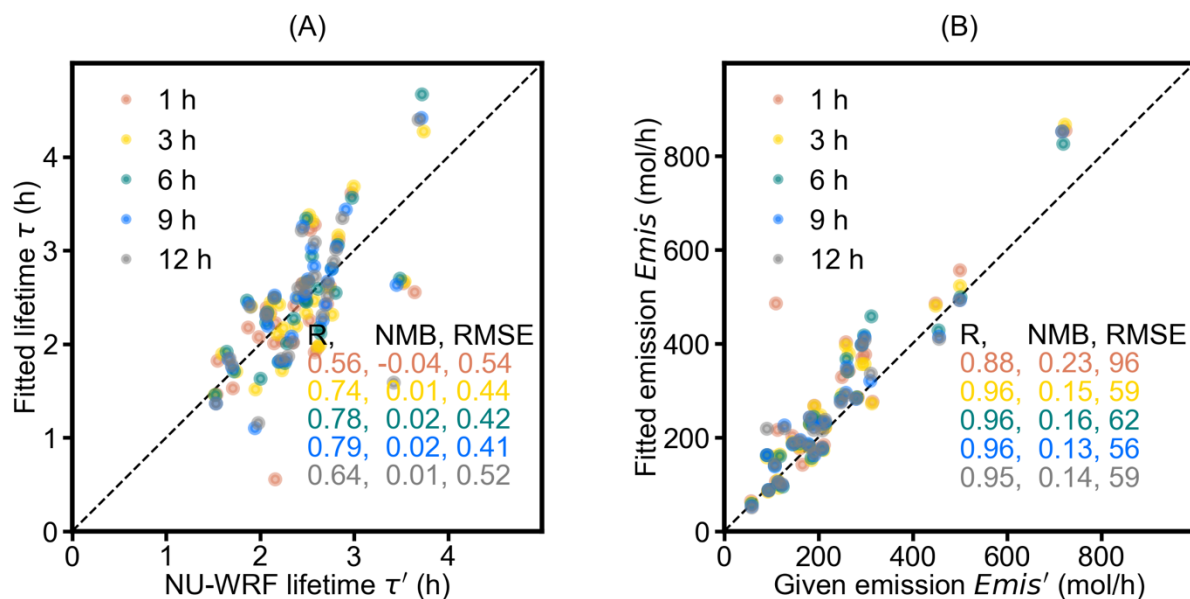

**Figure S3** Scatterplots of (A) the fitted NO<sub>x</sub> lifetime  $\tau$  as compared to the NU-WRF lifetime  $\tau'$ ; and (B) the fitted NO<sub>x</sub> emissions  $Emis$  as compared to the given emissions  $Emis'$ . The results deriving from the wind fields sampled at the TROPOMI overpass time (“1 h”), the weighted average of 3 h wind fields (“3 h”), 6 h wind fields (“6 h”), 9 h wind fields (“9 h”), and 12 h wind fields (“12 h”) are displayed by red, yellow, green, blue, and grey dots, respectively. The dash line represents the 1:1 line.
