# Supplementary material for: A new method for inferring city emissions and lifetimes of nitrogen oxides from high-resolution nitrogen dioxide observations: A model study
Source: Copernicus journal article supplement (doi:10.5194/acp-2021-642), 2021-08-19

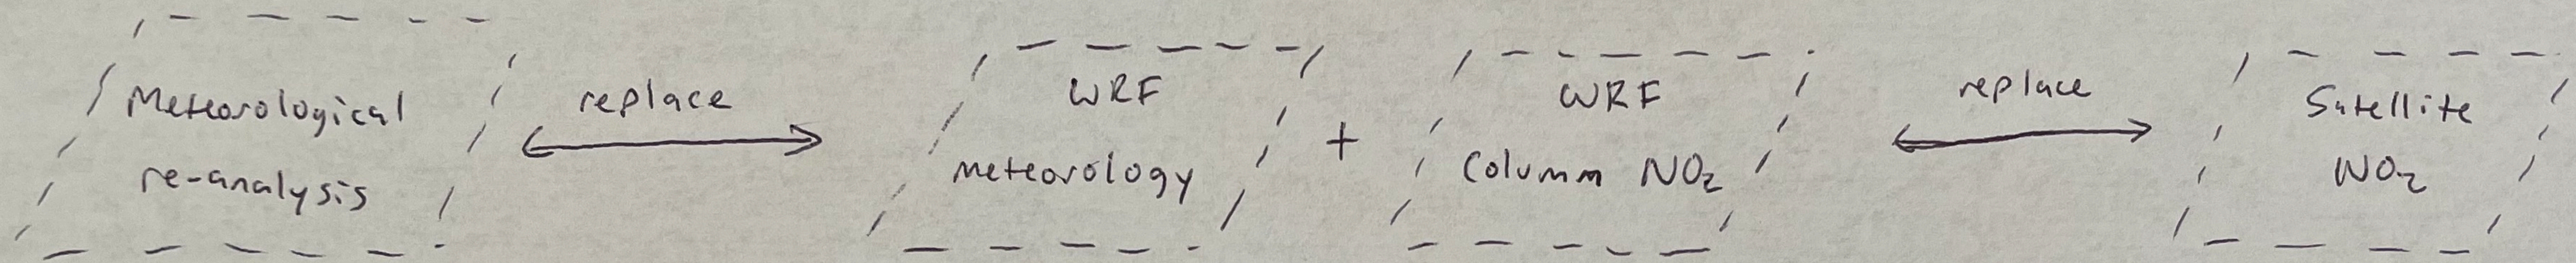

⇓ MISATEAM

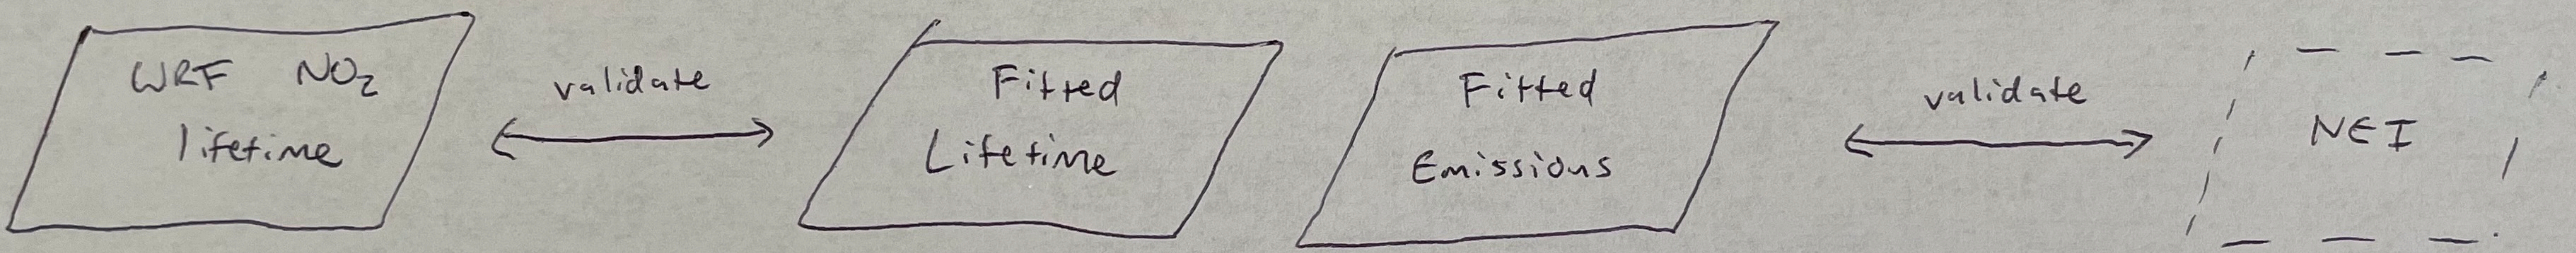

Supplement: Supplementary file [file acp-2021-642-RC1-supplement.pdf]
